# Supplementary material for: Association of Statins for Primary Prevention of Cardiovascular Diseases With Hospitalization for COVID‐19: A Nationwide Matched Population‐Based Cohort Study
Source: PubMed Central journal article supplement — J Am Heart Assoc. 2022 Jun 14;11(12):e023357. doi: 10.1161/JAHA.121.023357 (PMC9238639; doi:10.1161/jaha.121.023357), 2022-06-14
Supplement: JAH3-11-e023357-s001.pdf [file JAH3-11-e023357-s001.pdf]

# **SUPPLEMENTAL MATERIAL**

**Table S1. Non-inclusion criteria**

Most criteria were defined based on ICD-10 and ATC codes.

**ICD-10 codes:** any occurrence in the 5 years preceding inclusion date (February 15, 2020) is used.

**ATC codes:** having 3 dispensing (or 2 when at least one concerned the dispensing of large pack size) in the year preceding inclusion date is used. For lipid lowering drugs, additional condition was required: having at least one dispensing in the last month (if small pack size) or 3 months (if large pack size) preceding inclusion.

Other codes were also detailed.

| Exclusion criteria                                                                                                                                                                                                                                                                                             | Codes                                                                                                                                                                                                                                                                                                                          |
|----------------------------------------------------------------------------------------------------------------------------------------------------------------------------------------------------------------------------------------------------------------------------------------------------------------|--------------------------------------------------------------------------------------------------------------------------------------------------------------------------------------------------------------------------------------------------------------------------------------------------------------------------------|
| <b>Lipid lowering drugs</b>                                                                                                                                                                                                                                                                                    |                                                                                                                                                                                                                                                                                                                                |
| Fibrates                                                                                                                                                                                                                                                                                                       |                                                                                                                                                                                                                                                                                                                                |
| ATC                                                                                                                                                                                                                                                                                                            | C10AB                                                                                                                                                                                                                                                                                                                          |
| Bile acid sequestrants                                                                                                                                                                                                                                                                                         |                                                                                                                                                                                                                                                                                                                                |
| ATC                                                                                                                                                                                                                                                                                                            | C10AC                                                                                                                                                                                                                                                                                                                          |
| Nicotinic acid and derivatives                                                                                                                                                                                                                                                                                 |                                                                                                                                                                                                                                                                                                                                |
| ATC                                                                                                                                                                                                                                                                                                            | C10AD                                                                                                                                                                                                                                                                                                                          |
| Other lipid lowering drugs (ezetimibe, PCSK9 inhibitors,* etc.)                                                                                                                                                                                                                                                |                                                                                                                                                                                                                                                                                                                                |
| ATC                                                                                                                                                                                                                                                                                                            | C10AX                                                                                                                                                                                                                                                                                                                          |
| Combinations of lipid lowering drugs                                                                                                                                                                                                                                                                           |                                                                                                                                                                                                                                                                                                                                |
| ATC                                                                                                                                                                                                                                                                                                            | C10B                                                                                                                                                                                                                                                                                                                           |
|                                                                                                                                                                                                                                                                                                                |                                                                                                                                                                                                                                                                                                                                |
| <b>Cardiovascular and neurovascular diseases</b>                                                                                                                                                                                                                                                               |                                                                                                                                                                                                                                                                                                                                |
| Include following conditions:<br>Acute or chronic coronary artery disease<br>Acute stroke or aftermath<br>Acute or chronic heart failure<br>Peripheral vascular disease<br>Arrhythmia or cardiac conduction disorders<br>Valvular heart disease<br>Acute pulmonary embolism<br>Other cardiovascular conditions |                                                                                                                                                                                                                                                                                                                                |
| ICD-10                                                                                                                                                                                                                                                                                                         | I50 J81 I11 I13 K761 I20 I21 I22 I23 I24 I25 I48 I05 I06 I07 I08 I34 I35 I36 I37 I38 I39 I44, I45, I47, I48, I49 I702, I26 I739, I74.0, I74.3, I74.4, I74.5, G46 I60 I61 I62 I63 I64 I65 I66 I67 I68 I69 G45 I26 I800 I801 I802 I803 I808 I809 I81 I82 I70, I73, I74 only for those included in the list of long-term diseases |
| <b>Other comorbidities</b>                                                                                                                                                                                                                                                                                     |                                                                                                                                                                                                                                                                                                                                |
| Cancer                                                                                                                                                                                                                                                                                                         |                                                                                                                                                                                                                                                                                                                                |
| ICD-10                                                                                                                                                                                                                                                                                                         | C0x.x-C9x.x<br>D00.x-D09.x<br>Z08, Z51.0, Z51.1                                                                                                                                                                                                                                                                                |
| Kidney transplant, dialysis                                                                                                                                                                                                                                                                                    |                                                                                                                                                                                                                                                                                                                                |
| ICD-10                                                                                                                                                                                                                                                                                                         | N18 (long-term diseases), Z940                                                                                                                                                                                                                                                                                                 |
| CCAM                                                                                                                                                                                                                                                                                                           | JAEA003, HNEA002<br>JVJB001, JVJF004, JVJF008, JVRP004, JVRP007, JVRP008, YYYY007                                                                                                                                                                                                                                              |
| Diagnosis related group                                                                                                                                                                                                                                                                                        | 27C06, 24M39Z, 11M17                                                                                                                                                                                                                                                                                                           |

|                                                                                                                       |                          |
|-----------------------------------------------------------------------------------------------------------------------|--------------------------|
|                                                                                                                       | 11K02, 28Z01-28Z04       |
| Billing code for dialysis session conducted at home, self-care dialysis, in a dialysis unit under medical supervision | D11-D16, D20-24          |
| Dementia                                                                                                              |                          |
| ICD-10                                                                                                                | F00 F01 F02 F03 F051 G30 |
| ATC                                                                                                                   | N06DA04 N06DX01          |

\*For PCSK9 inhibitors: any dispensing in the past year.

## Table S2. Exposure of interest

**Definition (ATC codes):** having 3 dispensing (or 2 when at least one concerned the dispensing of large pack size) in the year preceding inclusion date and having at least one dispensing in the last month (if small pack size) or 3 months (if large pack size) preceding inclusion.

Types and statin intensity was defined based on the lastly dispensed statin between November 15, 2019 and February 15, 2020 (index date).

### Types of statins

| Statins (HMG CoA reductase inhibitors) | ATC codes |
|----------------------------------------|-----------|
| Atorvastatin                           | C10AA05   |
| Fluvastatin                            | C10AA04   |
| Pravastatin                            | C10AA03   |
| Rosuvastatin                           | C10AA07   |
| Simvastatin                            | C10AA01   |

### Classification of statins according to their intensity

This classification is based on an article published by ACC/AHA, Circulation, 2019.

| Intensity (LDL-cholesterol lowering) | Dose 1 | Dose 2 |
|--------------------------------------|--------|--------|
| <b>Low (&lt; 30%)</b>                |        |        |
| Fluvastatin                          | 20     | 40     |
| Pravastatin                          | 10     | 20     |
| Simvastatin                          | 10     |        |
| <b>Moderate (30% - 49%)</b>          |        |        |
| Atorvastatin                         | 10     | 20     |
| Rosuvastatin                         | 5      | 10     |
| Simvastatin                          | 20     | 40     |
| Pravastatin                          | 40     |        |
| Fluvastatin                          | 80     |        |
| <b>High (≥50%)</b>                   |        |        |
| Atorvastatin                         | 40     | 80     |
| Rosuvastatin                         | 20     |        |

**Table S3. Matching variables**

Most criteria were defined based on ICD-10 and ATC codes.

**ICD-10 codes:** any occurrence in the 5 years preceding inclusion date (February 15, 2020) is used.

**ATC codes:** having 3 dispensing (or 2 when at least one concerned the dispensing of large pack size) in the year preceding inclusion date is used.

In addition to year of birth, sex, residence area, other matching variables were:

| Covariates                    | Codes                                                                                                                                                                                                                                                                                                                                                                                                                                                                                                                                                                                                                                                                                                                                                                                                                                                                                                                                                                                           |
|-------------------------------|-------------------------------------------------------------------------------------------------------------------------------------------------------------------------------------------------------------------------------------------------------------------------------------------------------------------------------------------------------------------------------------------------------------------------------------------------------------------------------------------------------------------------------------------------------------------------------------------------------------------------------------------------------------------------------------------------------------------------------------------------------------------------------------------------------------------------------------------------------------------------------------------------------------------------------------------------------------------------------------------------|
| Hypertension<br>ATC           | C02AB02, C02AC01, C02AC02, C02AC05, C02AC06, C02CA01, C02CA06, C02DC01, C02LA01, C03AA01, C03AA03, C03BA04, C03BA10, C03BA11, C03BX03, C03CA01, C03CA02, C03CA03, C03DA01, C03DB01, C03EA, C03EA01, C03EA04, C07AA02, C07AA03, C07AA05, C07AA06, C07AA12, C07AA15, C07AA16, C07AA23, C07AB02, C07AB03, C07AB04, C07AB05, C07AB07, C07AB08, C07AB12, C07AG01, C07BA02, C07BB02, C07BB03, C07BB07, C07BB12, C07CA03, C07DA06, C07FB02, C07FB03, C08CA01, C08CA02, C08CA03, C08CA04, C08CA05, C08CA08, C08CA09, C08CA11, C08CA13, C08CX01, C08DA01, C08DB01, C08GA02, C09AA01, C09AA02, C09AA03, C09AA04, C09AA05, C09AA06, C09AA07, C09AA08, C09AA09, C09AA10, C09AA13, C09AA15, C09AA16, C09BA01, C09BA02, C09BA03, C09BA04, C09BA05, C09BA06, C09BA07, C09BA09, C09BA15, C09BB02, C09BB04, C09BB10, C09BX02, C09CA01, C09CA02, C09CA03, C09CA04, C09CA06, C09CA07, C09CA08, C09DA01, C09DA02, C09DA03, C09DA04, C09DA06, C09DA07, C09DA08, C09DB01, C09DB02, C09DB04, C09XA02, C09XA52, C10BX03 |
| Diabetes mellitus             |                                                                                                                                                                                                                                                                                                                                                                                                                                                                                                                                                                                                                                                                                                                                                                                                                                                                                                                                                                                                 |
| ICD-10<br>ATC                 | E10, E11, E12, E13, E14<br>G59.0, G63.2, G73.0, G99.0, H28.0, H36.0, I79.2, L97, M14.2, M14.6, N08.3<br>A10 excluding benfluorex (A10BX06)                                                                                                                                                                                                                                                                                                                                                                                                                                                                                                                                                                                                                                                                                                                                                                                                                                                      |
| Chronic respiratory condition |                                                                                                                                                                                                                                                                                                                                                                                                                                                                                                                                                                                                                                                                                                                                                                                                                                                                                                                                                                                                 |
| ICD-10<br>ATC                 | J40, J41, J42, J43, J44, J45, J46, J47, J96 (excluding J96.0, J96.9), J98<br>R03 (drugs for obstructive airway diseases)                                                                                                                                                                                                                                                                                                                                                                                                                                                                                                                                                                                                                                                                                                                                                                                                                                                                        |

**Table S4. Covariates**

Most criteria were defined based on ICD-10 and ATC codes.

**ICD-10 codes:** any occurrence in the 5 years preceding inclusion date (February 15, 2020) is used.

**ATC codes:** having 3 dispensing (or 2 when at least one concerned the dispensing of large pack size) in the year preceding inclusion date is used.

Other codes were also detailed.

| Covariates                             | Codes                                                                                                                                                                                                                                                                                                                                                                         |
|----------------------------------------|-------------------------------------------------------------------------------------------------------------------------------------------------------------------------------------------------------------------------------------------------------------------------------------------------------------------------------------------------------------------------------|
| <b>Health behavior characteristics</b> |                                                                                                                                                                                                                                                                                                                                                                               |
| <b>Smoking-related condition</b>       |                                                                                                                                                                                                                                                                                                                                                                               |
| ICD-10                                 | Z716 F17 T652 Z720                                                                                                                                                                                                                                                                                                                                                            |
| ATC                                    | N07BA                                                                                                                                                                                                                                                                                                                                                                         |
| Primary care delivery                  | Tobacco consultation service (9566, 9526, 9527) in the 5 years preceding index date (at least once)                                                                                                                                                                                                                                                                           |
| <b>Alcohol-related condition</b>       |                                                                                                                                                                                                                                                                                                                                                                               |
| ICD-10                                 | E244, E512, F10, G312, G621, G721, I426, K292, K70, K860, R780, T51, X45, X65, Y15, Y90, Y91, Y573, Z502, Z714, or Z721                                                                                                                                                                                                                                                       |
| ATC                                    | N07BB01, N07BB03, N07BB04, N07BB05 at least 2 dispensing in the 5 years preceding index date<br>M03BX01 (baclofen) without following neurological disease (ICD-10): C70, C71, C793, C794, D32, D33, D42, D43, G04, G05, G06, G09, G12, G13, G24, G25, G26, G31, G32, G35, G36, G37, G46, G80, G81, G82, G83, G91, G93, G95                                                    |
| Laboratory test (NABM)                 | 516, 517, 519 (gamma-GT)                                                                                                                                                                                                                                                                                                                                                      |
| <b>Obesity-related condition</b>       |                                                                                                                                                                                                                                                                                                                                                                               |
| ICD-10                                 | E66 excluding E66.03, E66.13, E66.83, E66.93 (since 2006)                                                                                                                                                                                                                                                                                                                     |
| CCAM                                   | HFCA001, HFCC003, HFFA001, HFFA011, HFFC004, HFFC018, HFGC900, HFKA001, HFKA002, HFKC001, HFLC900, HFLE002, HFMA009, HFMA010, HFMA011, HFMC006, HFMC007, HFMC008, HGCA009, HGCC027 (bariatric surgery)                                                                                                                                                                        |
| <b>Comorbidities or comedications</b>  |                                                                                                                                                                                                                                                                                                                                                                               |
| <b>Liver and pancreas disorder</b>     |                                                                                                                                                                                                                                                                                                                                                                               |
| ICD-10                                 | B18, I85, K70, K71, K72, K73, K74, K75, K76<br>K85, K86                                                                                                                                                                                                                                                                                                                       |
| ATC/UCD/CIP                            | Treatment for chronic hepatitis B:<br>J05AF08, J05AF10, J05AF11<br>9212525, 9212531 (UCD, Zeffix®)<br>3519671, 3519694 (CIP, Zeffix®)<br>Treatment for chronic hepatitis B:<br>L03AB05, L03AB09, L03AB10, L03AB11<br>J05AB04<br>J05AP08, J05AP51, J05AP55, J05AP56, J05AX<br>(3400930108765 (CIP), 3400894287391 (UCD)), J05AX14, J05AX15, J05AX16, J05AX65, J05AX67, J05AX68 |
| Laboratory test (NABM)                 | 4125: hepatitis C genotype<br>4124: hepatitis C viral load<br>1000 to 1002 (Fibrotest®, Fibromètre®V, Hépascore®)                                                                                                                                                                                                                                                             |
| CCAM                                   | HLQM002, HLHB001, HLHH001, HLHH005, HLHJ003 (liver biopsy, etc.)                                                                                                                                                                                                                                                                                                              |
| <b>Medications (ATC)</b>               |                                                                                                                                                                                                                                                                                                                                                                               |

|                                             |                                                                                                                                                                                                                                                                                                                                 |
|---------------------------------------------|---------------------------------------------------------------------------------------------------------------------------------------------------------------------------------------------------------------------------------------------------------------------------------------------------------------------------------|
| Non-steroidal anti-inflammatory drugs (ATC) | M01AE09, M01AE11, M01AE01, M01AE02, M01AB01, M01AE03, M01AB05, M01AB16, M01AH01, M01AH05, M01AC01, M01AC02, M01AC06, M01AX01, M01AX17, M01AB08, M01AE16, M01AX02, M01AX22, M01AX21                                                                                                                                              |
| Low-dose aspirin (CIP)                      | 18 CIP codes:<br>3400934744198<br>3400933247379<br>3400931893639<br>3400932703616<br>3400926939939<br>3400938206371<br>3400933226558<br>3400934323492<br>3400934300141<br>3400930013953<br>3400930013984<br>3400930014035<br>3400930014066<br>3400935902269<br>3400935984814<br>3400926940188<br>3400930182543<br>3400930195697 |
| Antiplatelet                                | B01AC04-B01AC07<br>B01AC22-B01AC24<br>B01AC30                                                                                                                                                                                                                                                                                   |
| Heparin                                     | B01AB,B01AX                                                                                                                                                                                                                                                                                                                     |
| Anticoagulant                               | B01AA,B01AE,B01AF,B01AX                                                                                                                                                                                                                                                                                                         |
| Oral corticosteroid                         | H02A                                                                                                                                                                                                                                                                                                                            |
| Anxiolytic                                  | N05BA01, N05BA04, N05BA05, N05BA06, N05BA08, N05BA09, N05BA11, N05BA12, N05BA16, N05BA18, N05BA21, N05BA23, N05BB01, N05BB02, N05BC01, N05BE01, N05BX03                                                                                                                                                                         |
| Hypnotic                                    | N05BC51, N05CD02, N05CD03, N05CD04, N05CD05, N05CD06, N05CD07, N05CD11, N05CF01, N05CF02, N05CM11, N05CM16, N05CX                                                                                                                                                                                                               |
| Antidepressant                              | N06A, N05AN01, N03AG02<br>3400934876233, 3400934876691, 3400935444271 (CIP)                                                                                                                                                                                                                                                     |
| Antipsychotic                               | N05A (excluding N05AN01 and N05AL06)<br>3400932896332 (CIP)                                                                                                                                                                                                                                                                     |

NABM: *nomenclature des actes de biologie médicale.*

**Table S5. Population distribution by geographical region**

|                                   | In metropolitan France |        | In the present study |                  |
|-----------------------------------|------------------------|--------|----------------------|------------------|
|                                   | January 1, 2021*       |        | No exposure          | Statin exposure  |
| <b>Auvergne-Rhône-Alpes</b>       | 8,092,598              | (12,4) | 213,640 (10.4)       | 213,640 (10.4)   |
| <b>Bourgogne-Franche-Comté</b>    | 2,786,205              | (4,3)  | 98,693 (4.8)         | 98,693 (4.8)     |
| <b>Bretagne</b>                   | 3,371,297              | (5,2)  | 104,714 (5.1)        | 104,714 (5.1)    |
| <b>Centre-Val de Loire</b>        | 2,562,431              | (3,9)  | 95,625 (4.6)         | 95,625 (4.6)     |
| <b>Corse</b>                      | 349,273                | (0,5)  | 8,697 (0.4)          | 8,697 (0.4)      |
| <b>Grand Est</b>                  | 5,524,817              | (8,5)  | 192,826 (9.4)        | 192,826 (9.4)    |
| <b>Hauts-de-France</b>            | 5,977,46               | (9,2)  | 234,718 (11.4)       | 234,718 (11.4)   |
| <b>Île-de-France</b>              | 12,326,429             | (18,9) | 317,010 (15.4)       | 317,010 (15.4)   |
| <b>Normandie</b>                  | 3,306,092              | (5,1)  | 121,260 (5.9)        | 121,260 (5.9)    |
| <b>Nouvelle Aquitaine</b>         | 6,039,767              | (9,3)  | 199,285 (9.7)        | 199,285 (9.7)    |
| <b>Occitanie</b>                  | 5,985,751              | (9,2)  | 164,959 (8.0)        | 164,959 (8.0)    |
| <b>Pays de la Loire</b>           | 3,838,060              | (5,9)  | 125,184 (6.1)        | 125,184 (6.1)    |
| <b>Provence-Alpes-Côte d'Azur</b> | 5,089,661              | (7,8)  | 133,389 (6.5)        | 133,389 (6.5)    |
| <b>Total</b>                      | <b>65,249,843</b>      |        | <b>2,058,249</b>     | <b>2,058,249</b> |

\*Source: INSEE, Population census. Data available on the French Institute for Demographic Studies website (INED: <https://www.ined.fr>).



**Table S6. Association between statin exposure and hospitalization for COVID-19**

|                                      | Hospitalization<br>N=9396 | IPTW*            |         | IPTW further adjusted model† |         |
|--------------------------------------|---------------------------|------------------|---------|------------------------------|---------|
|                                      |                           | HR [95%CI]       | P-value | HR [95%CI]                   | P-value |
| <b>Statin exposure</b>               |                           |                  |         |                              |         |
| No exposure                          | 5,024 (0.24)              | 1                | .       | 1                            | .       |
| Statin exposure                      | 4,372 (0.21)              | 0.85 [0.82-0.89] | <.0001  | 0.84 [0.80-0.87]             | <.0001  |
| <b>Type of statin</b>                |                           |                  |         |                              |         |
| No exposure                          | 5,024 (0.24)              | 1                | .       | 1                            | .       |
| Atorvastatin                         | 1,944 (0.23)              | 0.91 [0.85-0.97] | 0.0035  | 0.88 [0.83-0.94]             | 0.0002  |
| Fluvastatin                          | 92 (0.17)                 | 0.69 [0.52-0.92] | 0.0114  | 0.71 [0.53-0.95]             | 0.0212  |
| Pravastatin                          | 730 (0.19)                | 0.86 [0.77-0.95] | 0.0038  | 0.84 [0.76-0.93]             | 0.0012  |
| Rosuvastatin                         | 794 (0.21)                | 0.82 [0.75-0.91] | <.0001  | 0.80 [0.72-0.88]             | <.0001  |
| Simvastatin                          | 812 (0.20)                | 0.79 [0.72-0.87] | <.0001  | 0.78 [0.71-0.87]             | <.0001  |
| <b>Statin intensity</b>              |                           |                  |         |                              |         |
| No exposure                          | 5,024 (0.24)              | 1                | .       | 1                            | .       |
| Low                                  | 778 (0.18)                | 0.79 [0.71-0.87] | <.0001  | 0.78 [0.71-0.87]             | <.0001  |
| Moderate                             | 3,231 (0.22)              | 0.85 [0.81-0.89] | <.0001  | 0.83 [0.79-0.88]             | <.0001  |
| High                                 | 363 (0.28)                | 1.12 [0.95-1.31] | 0.1756  | 1.04 [0.88-1.23]             | 0.6193  |
| <b>Statin intensity and its type</b> |                           |                  |         |                              |         |
| No exposure                          | 5,024 (0.24)              | 1                | .       | 1                            | .       |
| <u>Low</u>                           |                           |                  |         |                              |         |
| Fluvastatin 20/40                    | 58 (0.17)                 | 0.71 [0.50-1.01] | 0.0595  | 0.74 [0.51-1.06]             | 0.0973  |
| Pravastatin 10/20                    | 537 (0.19)                | 0.82 [0.73-0.93] | 0.0015  | 0.81 [0.72-0.92]             | 0.0007  |
| Simvastatin 10                       | 183 (0.17)                | 0.71 [0.59-0.87] | 0.0009  | 0.72 [0.59-0.89]             | 0.0018  |
| <u>Moderate</u>                      |                           |                  |         |                              |         |
| Atorvastatin 10/20                   | 1,638 (0.23)              | 0.88 [0.82-0.95] | 0.0004  | 0.86 [0.80-0.93]             | <.0001  |
| Fluvastatin 80                       | 34 (0.16)                 | 0.66 [0.41-1.06] | 0.0886  | 0.67 [0.42-1.09]             | 0.1048  |
| Pravastatin 40                       | 193 (0.22)                | 0.97 [0.79-1.20] | 0.8066  | 0.94 [0.76-1.17]             | 0.5806  |
| Rosuvastatin 5/10                    | 737 (0.20)                | 0.80 [0.72-0.88] | <.0001  | 0.78 [0.71-0.87]             | <.0001  |
| Simvastatin 20/40                    | 629 (0.21)                | 0.82 [0.73-0.91] | 0.0003  | 0.81 [0.72-0.90]             | 0.0001  |
| <u>High</u>                          |                           |                  |         |                              |         |
| Atorvastatin 40/80                   | 306 (0.28)                | 1.09 [0.91-1.29] | 0.3393  | 1.02 [0.85-1.22]             | 0.8238  |
| Rosuvastatin 20                      | 57 (0.28)                 | 1.29 [0.85-1.95] | 0.2252  | 1.18 [0.78-1.80]             | 0.4359  |

HR for hazard ratio; 95%CI for 95% confidence interval; IPTW for inverse probability of treatment weighting.

\*Conditional Cox proportional hazards model with IPTW.

†Conditional Cox proportional hazards model with IPTW further adjusted for the following covariates: social deprivation index, smoking-, alcohol-, and obesity-related conditions, liver failure, and concomitant medications (non-steroidal anti-inflammatory, low-dose aspirin, antiplatelet agent, heparin, anticoagulant, oral corticosteroid, anxiolytic, hypnotic, antidepressant, antipsychotic).

**Table S7. Association between statin exposure and hospital outcomes after excluding participants with low-dose aspirin**

|                                        | Fully adjusted model <sup>*</sup> |         |
|----------------------------------------|-----------------------------------|---------|
|                                        | HR [95%CI]                        | P-value |
| <b>Hospitalization for COVID-19</b>    |                                   |         |
| Statin exposure                        |                                   |         |
| No                                     | 1                                 | -       |
| Yes                                    | 0.84 [0.79-0.89]                  | <.0001  |
| Statin intensity                       |                                   |         |
| No exposition                          | 1                                 | -       |
| Low                                    | 0.79 [0.70-0.89]                  | 0.0002  |
| Moderate                               | 0.84 [0.79-0.90]                  | 0.0000  |
| High                                   | 1.04 [0.83-1.31]                  | 0.7330  |
| <b>In-hospital deaths for COVID-19</b> |                                   |         |
| Statin exposure                        |                                   |         |
| No                                     | 1                                 | -       |
| Yes                                    | 0.80 [0.68-0.92]                  | 0.0028  |
| Statin intensity                       |                                   |         |
| No exposition                          | 1                                 | -       |
| Low                                    | 0.74 [0.54-1.02]                  | 0.0639  |
| Moderate                               | 0.78 [0.66-0.93]                  | 0.0061  |
| High                                   | 1.36 [0.73-2.54]                  | 0.3352  |

HR for hazard ratio; 95%CI for 95% confidence interval.

<sup>\*</sup>Conditional Cox proportional hazards model adjusted for the following covariates: social deprivation index, smoking-, alcohol-, and obesity-related conditions, liver failure, and concomitant medications (non-steroidal anti-inflammatory, antiplatelet agent, heparin, anticoagulant, oral corticosteroid, anxiolytic, hypnotic, antidepressant, antipsychotic).

**Table S8. Characteristics of the study population according to statin intensity**

|                            | Before IPTW                  |                    |                           |                     | After IPTW                   |                    |                           |                     |
|----------------------------|------------------------------|--------------------|---------------------------|---------------------|------------------------------|--------------------|---------------------------|---------------------|
|                            | No exposure<br>(n=2,058,249) | Low<br>(n=431,167) | Moderate<br>(n=1,496,809) | High<br>(n=130,273) | No exposure<br>(n=2,059,865) | Low<br>(n=430,877) | Moderate<br>(n=1,497,236) | High<br>(n=129,810) |
| <b>Matching variables</b>  |                              |                    |                           |                     |                              |                    |                           |                     |
| <b>Age (years)</b>         |                              |                    |                           |                     |                              |                    |                           |                     |
| Mean (SD)                  | 68.65 (10.36)                | 70.03 (10.39)      | 68.41 (10.31)             | 66.84 (10.40)       | 68.77 (10.45)                | 68.66 (10.43)      | 68.68 (10.25)             | 68.76 (10.25)       |
| <b>Age categories</b>      |                              |                    |                           |                     |                              |                    |                           |                     |
| 40-59                      | 395,018 (19.2)               | 68,576 (15.9)      | 294,549 (19.7)            | 31,893 (24.5)       | 393,908 (19.1)               | 83,290 (19.3)      | 281,126 (18.8)            | 24,167 (18.6)       |
| 60-69                      | 683,378 (33.2)               | 133,583 (31.0)     | 504,099 (33.7)            | 45,696 (35.1)       | 675,066 (32.8)               | 141,375 (32.8)     | 501,607 (33.5)            | 43,582 (33.5)       |
| 70-79                      | 660,264 (32.1)               | 146,141 (33.9)     | 476,803 (31.9)            | 37,320 (28.6)       | 659,763 (32.1)               | 138,366 (32.1)     | 486,325 (32.5)            | 41,898 (32.2)       |
| >=80                       | 319,589 (15.5)               | 82,867 (19.2)      | 221,358 (14.8)            | 15,364 (11.8)       | 331,128 (16.1)               | 67,846 (15.7)      | 228,178 (15.2)            | 20,163 (15.5)       |
| <b>Sex</b>                 |                              |                    |                           |                     |                              |                    |                           |                     |
| Men                        | 958,989 (46.6)               | 180,842 (41.9)     | 705,247 (47.1)            | 72,900 (56.0)       | 953,716 (46.3)               | 200,817 (46.6)     | 695,127 (46.4)            | 59,735 (45.9)       |
| Women                      | 1,099,260 (53.4)             | 250,325 (58.1)     | 791,562 (52.9)            | 57,373 (44.0)       | 1,106,151 (53.7)             | 230,062 (53.4)     | 802,109 (53.6)            | 70,076 (53.8)       |
| <b>Residence area</b>      |                              |                    |                           |                     |                              |                    |                           |                     |
| Auvergne-Rhône-Alpes       | 213,640 (10.4)               | 46,402 (10.8)      | 153,759 (10.3)            | 13,479 (10.3)       | 211,820 (10.3)               | 46,107 (10.7)      | 153,836 (10.3)            | 13,630 (10.5)       |
| Bourgogne-Franche-Comté    | 98,693 (4.8)                 | 20,662 (4.8)       | 71,392 (4.8)              | 6,639 (5.1)         | 98,760 (4.8)                 | 20,419 (4.7)       | 71,484 (4.8)              | 6,894 (5.3)         |
| Bretagne                   | 104,714 (5.1)                | 26,632 (6.2)       | 71,362 (4.8)              | 6,720 (5.2)         | 103,224 (5.0)                | 25,991 (6.0)       | 72,537 (4.8)              | 6,891 (5.3)         |
| Centre-Val de Loire        | 95,625 (4.6)                 | 21,013 (4.9)       | 69,118 (4.6)              | 5,494 (4.2)         | 94,986 (4.6)                 | 20,878 (4.8)       | 70,104 (4.7)              | 5,898 (4.5)         |
| Corse                      | 8,697 (0.4)                  | 1,859 (0.4)        | 6,499 (0.4)               | 339 (0.3)           | 9,048 (0.4)                  | 1,789 (0.4)        | 6,347 (0.4)               | 302 (0.2)           |
| Grand Est                  | 192,826 (9.4)                | 37,524 (8.7)       | 144,291 (9.6)             | 11,011 (8.5)        | 196,157 (9.5)                | 37,416 (8.7)       | 142,586 (9.5)             | 11,074 (8.5)        |
| Hauts-de-France            | 234,718 (11.4)               | 41,586 (9.6)       | 176,315 (11.8)            | 16,817 (12.9)       | 241,077 (11.7)               | 41,848 (9.7)       | 173,364 (11.6)            | 16,086 (12.3)       |
| Ile-de-France              | 317,010 (15.4)               | 57,879 (13.4)      | 239,199 (16.0)            | 19,932 (15.3)       | 313,047 (15.2)               | 59,433 (13.8)      | 239,784 (16.0)            | 19,816 (15.2)       |
| Normandie                  | 121,260 (5.9)                | 27,880 (6.5)       | 86,616 (5.8)              | 6,764 (5.2)         | 122,824 (6.0)                | 27,751 (6.4)       | 86,127 (5.8)              | 6,725 (5.2)         |
| Nouvelle-Aquitaine         | 199,285 (9.7)                | 47,489 (11.0)      | 139,229 (9.3)             | 12,567 (9.6)        | 198,574 (9.6)                | 47,079 (10.9)      | 141,019 (9.4)             | 13,143 (10.1)       |
| Occitanie                  | 164,959 (8.0)                | 37,273 (8.6)       | 118,545 (7.9)             | 9,141 (7.0)         | 163,733 (8.0)                | 37,101 (8.6)       | 119,146 (8.0)             | 9,074 (7.0)         |
| Overseas departments       | 47,939 (2.3)                 | 7,349 (1.7)        | 35,138 (2.3)              | 5,452 (4.2)         | 48,232 (2.3)                 | 7,851 (1.8)        | 34,777 (2.3)              | 4,708 (3.6)         |
| Overseas territories       | 310 (0.0)                    | 65 (0.0)           | 207 (0.0)                 | 38 (0.0)            | 315 (0.0)                    | 74 (0.0)           | 206 (0.0)                 | 36 (0.0)            |
| Pays de la Loire           | 125,184 (6.1)                | 30,893 (7.2)       | 85,542 (5.7)              | 8,749 (6.7)         | 124,445 (6.0)                | 30,582 (7.1)       | 86,012 (5.7)              | 8,234 (6.3)         |
| Provence-Alpes-Côte d'Azur | 133,389 (6.5)                | 26,661 (6.2)       | 99,597 (6.7)              | 7,131 (5.5)         | 133,618 (6.5)                | 26,552 (6.2)       | 99,899 (6.7)              | 7,293 (5.6)         |
| <b>Covariates</b>          |                              |                    |                           |                     |                              |                    |                           |                     |
| <b>Hypertension</b>        |                              |                    |                           |                     |                              |                    |                           |                     |
| No                         | 1,198,186 (58.2)             | 237,112 (55.0)     | 878,869 (58.7)            | 82,205 (63.1)       | 1,194,456 (58.0)             | 249,811 (57.9)     | 870,240 (58.1)            | 78,250 (60.1)       |
| Yes                        | 860,063 (41.8)               | 194,055 (45.0)     | 617,940 (41.3)            | 48,068 (36.9)       | 865,410 (42.0)               | 181,067 (42.0)     | 626,997 (41.9)            | 51,561 (39.6)       |
| <b>Diabetes mellitus</b>   |                              |                    |                           |                     |                              |                    |                           |                     |

|                                             |                  |                |                  |                |                  |                |                  |                |
|---------------------------------------------|------------------|----------------|------------------|----------------|------------------|----------------|------------------|----------------|
| No                                          | 1,364,924 (66.3) | 307,159 (71.2) | 983,960 (65.7)   | 73,805 (56.7)  | 1,357,640 (66.0) | 286,008 (66.3) | 989,815 (66.1)   | 80,966 (62.2)  |
| Yes                                         | 693,325 (33.7)   | 124,008 (28.8) | 512,849 (34.3)   | 56,468 (43.3)  | 702,226 (34.1)   | 144,871 (33.6) | 507,421 (33.9)   | 48,845 (37.5)  |
| <b>Chronic respiratory condition</b>        |                  |                |                  |                |                  |                |                  |                |
| No                                          | 1,872,316 (91.0) | 394,499 (91.5) | 1,361,260 (90.9) | 116,557 (89.5) | 1,872,250 (91.0) | 391,818 (90.9) | 1,361,593 (91.0) | 117,580 (90.3) |
| Yes                                         | 185,933 (9.0)    | 36,668 (8.5)   | 135,549 (9.1)    | 13,716 (10.5)  | 187,617 (9.1)    | 39,060 (9.1)   | 135,644 (9.1)    | 12,231 (9.4)   |
| <b>Social deprivation index (quintiles)</b> |                  |                |                  |                |                  |                |                  |                |
| 1 (least deprived)                          | 343,795 (16.7)   | 66,309 (15.4)  | 244,750 (16.4)   | 19,149 (14.7)  | 338,101 (16.4)   | 66,521 (15.4)  | 246,129 (16.4)   | 20,596 (15.8)  |
| 2                                           | 366,832 (17.8)   | 77,603 (18.0)  | 264,559 (17.7)   | 22,214 (17.1)  | 362,894 (17.6)   | 78,132 (18.1)  | 266,239 (17.8)   | 23,306 (17.9)  |
| 3                                           | 393,467 (19.1)   | 85,186 (19.8)  | 283,928 (19.0)   | 24,197 (18.6)  | 392,651 (19.1)   | 84,848 (19.7)  | 284,438 (19.0)   | 24,495 (18.8)  |
| 4                                           | 422,536 (20.5)   | 94,334 (21.9)  | 306,801 (20.5)   | 26,949 (20.7)  | 425,373 (20.7)   | 93,683 (21.7)  | 306,602 (20.5)   | 26,327 (20.2)  |
| 5 (most deprived)                           | 449,430 (21.8)   | 92,908 (21.5)  | 336,361 (22.5)   | 30,443 (23.4)  | 457,832 (22.2)   | 92,534 (21.5)  | 333,883 (22.3)   | 28,688 (22.0)  |
| Unknown                                     | 82,189 (4.0)     | 14,827 (3.4)   | 60,410 (4.0)     | 7,321 (5.6)    | 83,015 (4.0)     | 15,158 (3.5)   | 59,943 (4.0)     | 6,398 (4.9)    |
| <b>Smoking-related condition</b>            |                  |                |                  |                |                  |                |                  |                |
| No                                          | 2,001,677 (97.3) | 417,468 (96.8) | 1,436,216 (96.0) | 122,283 (93.9) | 1,990,894 (96.7) | 416,274 (96.5) | 1,446,959 (96.7) | 125,253 (96.1) |
| Yes                                         | 56,572 (2.7)     | 13,699 (3.2)   | 60,593 (4.0)     | 7,990 (6.1)    | 68,973 (3.4)     | 14,605 (3.4)   | 50,278 (3.4)     | 4,558 (3.5)    |
| <b>Alcohol-related condition</b>            |                  |                |                  |                |                  |                |                  |                |
| No                                          | 2,025,242 (98.4) | 426,071 (98.8) | 1,474,072 (98.5) | 127,232 (97.7) | 2,028,053 (98.5) | 424,201 (98.4) | 1,474,250 (98.5) | 127,614 (98.0) |
| Yes                                         | 33,007 (1.6)     | 5,096 (1.2)    | 22,737 (1.5)     | 3,041 (2.3)    | 31,814 (1.5)     | 6,677 (1.5)    | 22,987 (1.5)     | 2,197 (1.7)    |
| <b>Obesity-related condition</b>            |                  |                |                  |                |                  |                |                  |                |
| No                                          | 2,015,058 (97.9) | 424,354 (98.4) | 1,464,716 (97.9) | 126,523 (97.1) | 2,016,463 (98.0) | 421,848 (97.8) | 1,465,808 (97.9) | 126,805 (97.3) |
| Yes                                         | 43,191 (2.1)     | 6,813 (1.6)    | 32,093 (2.1)     | 3,750 (2.9)    | 43,404 (2.1)     | 9,030 (2.1)    | 31,429 (2.1)     | 3,006 (2.3)    |
| <b>Liver and pancreas disorder</b>          |                  |                |                  |                |                  |                |                  |                |
| No                                          | 2,030,710 (98.7) | 428,432 (99.4) | 1,485,005 (99.2) | 128,971 (99.0) | 2,038,195 (99.0) | 426,312 (98.9) | 1,481,631 (99.0) | 128,335 (98.5) |
| Yes                                         | 27,539 (1.3)     | 2,735 (0.6)    | 11,804 (0.8)     | 1,302 (1.0)    | 21,672 (1.1)     | 4,566 (1.1)    | 15,606 (1.0)     | 1,476 (1.1)    |
| <b>Non-steroidal anti-inflammatory</b>      |                  |                |                  |                |                  |                |                  |                |
| No                                          | 1,732,982 (84.2) | 364,847 (84.6) | 1,245,484 (83.2) | 109,615 (84.1) | 1,725,349 (83.8) | 361,483 (83.8) | 1,255,350 (83.9) | 107,885 (82.8) |
| Yes                                         | 325,267 (15.8)   | 66,320 (15.4)  | 251,325 (16.8)   | 20,658 (15.9)  | 334,517 (16.3)   | 69,396 (16.1)  | 241,887 (16.2)   | 21,927 (16.8)  |
| <b>Low-dose aspirin</b>                     |                  |                |                  |                |                  |                |                  |                |
| No                                          | 1,827,030 (88.8) | 328,902 (76.3) | 1,108,038 (74.0) | 77,365 (59.4)  | 1,669,681 (81.1) | 348,232 (80.8) | 1,215,634 (81.2) | 105,230 (80.8) |
| Yes                                         | 231,219 (11.2)   | 102,265 (23.7) | 388,771 (26.0)   | 52,908 (40.6)  | 390,186 (19.0)   | 82,646 (19.2)  | 281,602 (18.8)   | 24,581 (18.9)  |
| <b>Antiplatelet agent</b>                   |                  |                |                  |                |                  |                |                  |                |
| No                                          | 2,042,260 (99.2) | 423,613 (98.2) | 1,459,937 (97.5) | 122,258 (93.8) | 2,021,734 (98.2) | 423,714 (98.3) | 1,472,331 (98.4) | 127,585 (97.9) |
| Yes                                         | 15,989 (0.8)     | 7,554 (1.8)    | 36,872 (2.5)     | 8,015 (6.2)    | 38,133 (1.9)     | 7,164 (1.7)    | 24,906 (1.7)     | 2,226 (1.7)    |
| <b>Heparin</b>                              |                  |                |                  |                |                  |                |                  |                |
| No                                          | 2,044,349 (99.3) | 428,538 (99.4) | 1,487,559 (99.4) | 129,411 (99.3) | 2,046,403 (99.4) | 428,086 (99.3) | 1,487,529 (99.4) | 128,922 (99.0) |
| Yes                                         | 13,900 (0.7)     | 2,629 (0.6)    | 9,250 (0.6)      | 862 (0.7)      | 13,463 (0.7)     | 2,792 (0.6)    | 9,708 (0.6)      | 889 (0.7)      |

**Anticoagulant**

|     |                  |                |                  |                |                  |                |                  |                |
|-----|------------------|----------------|------------------|----------------|------------------|----------------|------------------|----------------|
| No  | 2,010,491 (97.7) | 419,361 (97.3) | 1,455,088 (97.2) | 125,388 (96.3) | 2,005,242 (97.4) | 419,692 (97.3) | 1,458,442 (97.4) | 126,253 (96.9) |
| Yes | 47,758 (2.3)     | 11,806 (2.7)   | 41,721 (2.8)     | 4,885 (3.7)    | 54,624 (2.7)     | 11,187 (2.6)   | 38,794 (2.6)     | 3,558 (2.7)    |

**Oral corticosteroid**

|     |                  |                |                  |                |                  |                |                  |                |
|-----|------------------|----------------|------------------|----------------|------------------|----------------|------------------|----------------|
| No  | 1,944,371 (94.5) | 409,134 (94.9) | 1,416,044 (94.6) | 123,291 (94.6) | 1,947,198 (94.6) | 407,439 (94.5) | 1,415,769 (94.6) | 122,676 (94.2) |
| Yes | 113,878 (5.5)    | 22,033 (5.1)   | 80,765 (5.4)     | 6,982 (5.4)    | 112,668 (5.5)    | 23,439 (5.4)   | 81,468 (5.4)     | 7,135 (5.5)    |

**Anxiolytic**

|     |                  |                |                  |                |                  |                |                  |                |
|-----|------------------|----------------|------------------|----------------|------------------|----------------|------------------|----------------|
| No  | 1,872,500 (91.0) | 381,414 (88.5) | 1,326,948 (88.7) | 115,006 (88.3) | 1,844,824 (89.6) | 386,921 (89.7) | 1,343,356 (89.7) | 116,067 (89.1) |
| Yes | 185,749 (9.0)    | 49,753 (11.5)  | 169,861 (11.3)   | 15,267 (11.7)  | 215,043 (10.4)   | 43,958 (10.2)  | 153,881 (10.3)   | 13,744 (10.6)  |

**Hypnotic**

|     |                  |                |                  |                |                  |                |                  |                |
|-----|------------------|----------------|------------------|----------------|------------------|----------------|------------------|----------------|
| No  | 1,975,317 (96.0) | 409,748 (95.0) | 1,419,181 (94.8) | 123,358 (94.7) | 1,962,836 (95.4) | 411,091 (95.3) | 1,427,986 (95.4) | 123,565 (94.9) |
| Yes | 82,932 (4.0)     | 21,419 (5.0)   | 77,628 (5.2)     | 6,915 (5.3)    | 97,031 (4.7)     | 19,787 (4.6)   | 69,250 (4.6)     | 6,246 (4.8)    |

**Antidepressant**

|     |                  |                |                  |                |                  |                |                  |                |
|-----|------------------|----------------|------------------|----------------|------------------|----------------|------------------|----------------|
| No  | 1,902,683 (92.4) | 386,729 (89.7) | 1,344,623 (89.8) | 116,320 (89.3) | 1,873,144 (91.0) | 392,469 (91.0) | 1,363,551 (91.1) | 117,950 (90.5) |
| Yes | 155,566 (7.6)    | 44,438 (10.3)  | 152,186 (10.2)   | 13,953 (10.7)  | 186,722 (9.1)    | 38,410 (8.9)   | 133,686 (8.9)    | 11,861 (9.1)   |

**Antipsychotic**

|     |                  |                |                  |                |                  |                |                  |                |
|-----|------------------|----------------|------------------|----------------|------------------|----------------|------------------|----------------|
| No  | 2,044,795 (99.3) | 427,542 (99.2) | 1,484,359 (99.2) | 129,004 (99.0) | 2,044,152 (99.3) | 427,614 (99.2) | 1,486,009 (99.3) | 128,817 (98.9) |
| Yes | 13,454 (0.7)     | 3,625 (0.8)    | 12,450 (0.8)     | 1,269 (1.0)    | 15,715 (0.8)     | 3,265 (0.8)    | 11,227 (0.8)     | 995 (0.8)      |

---

**Table S9. Association between covariates and hospitalization for COVID-19 examined in a fully adjusted model**

|                                             | Fully adjusted model* |       |      | P-value |
|---------------------------------------------|-----------------------|-------|------|---------|
|                                             | HR                    | 95%CI |      |         |
| <b>Statin exposure</b>                      |                       |       |      |         |
| No exposure                                 | 1.00                  | .     | .    | .       |
| Statin exposure                             | 0.84                  | 0.81  | 0.88 | <.0001  |
| <b>Social deprivation index (quintiles)</b> |                       |       |      |         |
| 1 (least deprived)                          | 1.00                  | .     | .    | .       |
| 2                                           | 1.18                  | 1.07  | 1.31 | 0.0014  |
| 3                                           | 1.38                  | 1.23  | 1.54 | <.0001  |
| 4                                           | 1.42                  | 1.27  | 1.59 | <.0001  |
| 5 (most deprived)                           | 1.58                  | 1.42  | 1.75 | <.0001  |
| Unknown                                     | 1.34                  | 0.98  | 1.82 | 0.0631  |
| <b>Smoking-related condition</b>            |                       |       |      |         |
| No                                          | 1.00                  | .     | .    | .       |
| Yes                                         | 0.50                  | 0.41  | 0.63 | <.0001  |
| <b>Alcohol-related condition</b>            |                       |       |      |         |
| No                                          | 1.00                  | .     | .    | .       |
| Yes                                         | 1.31                  | 1.02  | 1.67 | 0.0322  |
| <b>Obesity-related condition</b>            |                       |       |      |         |
| No                                          | 1.00                  | .     | .    | .       |
| Yes                                         | 1.49                  | 1.25  | 1.79 | <.0001  |
| <b>Liver failure</b>                        |                       |       |      |         |
| No                                          | 1.00                  | .     | .    | .       |
| Yes                                         | 1.69                  | 1.34  | 2.12 | <.0001  |
| <b>Non-steroidal anti-inflammatory</b>      |                       |       |      |         |
| No                                          | 1.00                  | .     | .    | .       |
| Yes                                         | 1.11                  | 1.03  | 1.21 | 0.0084  |
| <b>Low-dose aspirin</b>                     |                       |       |      |         |
| No                                          | 1.00                  | .     | .    | .       |
| Yes                                         | 1.13                  | 1.06  | 1.22 | 0.0006  |
| <b>Antiplatelet agent</b>                   |                       |       |      |         |
| No                                          | 1.00                  | .     | .    | .       |
| Yes                                         | 1.58                  | 1.29  | 1.93 | <.0001  |
| <b>Heparin</b>                              |                       |       |      |         |
| No                                          | 1.00                  | .     | .    | .       |
| Yes                                         | 1.14                  | 0.81  | 1.60 | 0.4629  |
| <b>Anticoagulant</b>                        |                       |       |      |         |
| No                                          | 1.00                  | .     | .    | .       |
| Yes                                         | 1.35                  | 1.16  | 1.57 | <.0001  |
| <b>Oral corticosteroid</b>                  |                       |       |      |         |
| No                                          | 1.00                  | .     | .    | .       |
| Yes                                         | 1.55                  | 1.37  | 1.75 | <.0001  |
| <b>Anxiolytic</b>                           |                       |       |      |         |
| No                                          | 1.00                  | .     | .    | .       |
| Yes                                         | 1.06                  | 0.96  | 1.18 | 0.2398  |
| <b>Hypnotic</b>                             |                       |       |      |         |
| No                                          | 1.00                  | .     | .    | .       |

|                       | Fully adjusted model <sup>*</sup> |       |      |         |
|-----------------------|-----------------------------------|-------|------|---------|
|                       | HR                                | 95%CI |      | P-value |
| Yes                   | 0.94                              | 0.82  | 1.09 | 0.4046  |
| <b>Antidepressant</b> |                                   |       |      |         |
| No                    | 1.00                              | .     | .    | .       |
| Yes                   | 1.10                              | 0.98  | 1.22 | 0.0984  |
| <b>Antipsychotic</b>  |                                   |       |      |         |
| No                    | 1.00                              | .     | .    | .       |
| Yes                   | 1.91                              | 1.40  | 2.60 | <.0001  |

HR for hazard ratio; 95%CI for 95% confidence interval.

<sup>\*</sup>Conditional Cox proportional hazards model adjusted for the following covariates: social deprivation index, smoking-, alcohol-, and obesity-related conditions, liver failure, and concomitant medications (non-steroidal anti-inflammatory, low-dose aspirin, antiplatelet agent, heparin, anticoagulant, oral corticosteroid, anxiolytic, hypnotic, antidepressant, antipsychotic).

**Table S10. Association between statin exposure and in-hospital COVID-19 deaths**

|                                      | Death<br>N=1648 | IPTW*            |         | IPTW further adjusted model† |         |
|--------------------------------------|-----------------|------------------|---------|------------------------------|---------|
|                                      |                 | HR [95%CI]       | P-value | HR [95%CI]                   | P-value |
| <b>Statin exposure</b>               |                 |                  |         |                              |         |
| No exposure                          | 914 (0.044)     | 1                | .       | 1                            | .       |
| Statin exposure                      | 734 (0.036)     | 0.77 [0.69-0.85] | <.0001  | 0.76 [0.68-0.85]             | <.0001  |
| <b>Type of statin</b>                |                 |                  |         |                              |         |
| No exposure                          | 914 (0.044)     | 1                | .       | 1                            | .       |
| Atorvastatin                         | 329 (0.040)     | 0.86 [0.73-1.01] | 0.0584  | 0.83 [0.70-0.98]             | 0.0280  |
| Fluvastatin                          | 22 (0.040)      | 0.87 [0.48-1.57] | 0.6457  | 0.88 [0.47-1.65]             | 0.6970  |
| Pravastatin                          | 118 (0.031)     | 0.66 [0.52-0.84] | 0.0009  | 0.66 [0.51-0.85]             | 0.0014  |
| Rosuvastatin                         | 126 (0.033)     | 0.73 [0.58-0.93] | 0.0093  | 0.72 [0.56-0.92]             | 0.0084  |
| Simvastatin                          | 139 (0.034)     | 0.73 [0.58-0.91] | 0.0065  | 0.75 [0.59-0.96]             | 0.0212  |
| <b>Statin intensity</b>              |                 |                  |         |                              |         |
| No exposure                          | 914 (0.044)     | 1                | .       | 1                            | .       |
| Low                                  | 142 (0.033)     | 0.72 [0.58-0.90] | 0.0038  | 0.74 [0.59-0.94]             | 0.0116  |
| Moderate                             | 527 (0.035)     | 0.76 [0.68-0.86] | <.0001  | 0.75 [0.66-0.85]             | <.0001  |
| High                                 | 65 (0.050)      | 1.05 [0.71-1.55] | 0.8103  | 1.00 [0.66-1.51]             | 0.9977  |
| <b>Statin intensity and its type</b> |                 |                  |         |                              |         |
| No exposure                          | 914 (0.044)     | 1                | .       | 1                            | .       |
| <u>Low</u>                           |                 |                  |         |                              |         |
| Fluvastatin 20/40                    | 14 (0.040)      | 0.78 [0.39-1.56] | 0.4890  | 0.82 [0.39-1.72]             | 0.6016  |
| Pravastatin 10/20                    | 91 (0.032)      | 0.65 [0.49-0.85] | 0.0019  | 0.66 [0.50-0.88]             | 0.0041  |
| Simvastatin 10                       | 37 (0.034)      | 0.94 [0.59-1.50] | 0.8084  | 1.01 [0.62-1.64]             | 0.9769  |
| <u>Moderate</u>                      |                 |                  |         |                              |         |
| Atorvastatin 10/20                   | 273 (0.038)     | 0.82 [0.69-0.98] | 0.0278  | 0.80 [0.67-0.96]             | 0.0169  |
| Fluvastatin 80                       | 8 (0.038)       | 1.17 [0.37-3.73] | 0.7888  | 1.08 [0.33-3.55]             | 0.9052  |
| Pravastatin 40                       | 27 (0.031)      | 0.72 [0.42-1.24] | 0.2379  | 0.67 [0.38-1.17]             | 0.1628  |
| Rosuvastatin 5/10                    | 117 (0.032)     | 0.72 [0.57-0.92] | 0.0093  | 0.71 [0.55-0.91]             | 0.0072  |
| Simvastatin 20/40                    | 102 (0.033)     | 0.67 [0.51-0.87] | 0.0029  | 0.68 [0.52-0.91]             | 0.0079  |
| <u>High</u>                          |                 |                  |         |                              |         |
| Atorvastatin 40/80                   | 56 (0.051)      | 1.10 [0.71-1.71] | 0.6626  | 1.02 [0.65-1.61]             | 0.9380  |
| Rosuvastatin 20                      | 9 (0.044)       | 0.85 [0.35-2.10] | 0.7307  | 0.93 [0.37-2.34]             | 0.8697  |

HR for hazard ratio; 95%CI for 95% confidence interval; IPTW for inverse probability of treatment weighting.

\*Conditional Cox proportional hazards model with IPTW.

†Conditional Cox proportional hazards model with IPTW further adjusted for the following covariates: social deprivation index, smoking-, alcohol-, and obesity-related conditions, liver failure, and concomitant medications (non-steroidal anti-inflammatory, low-dose aspirin, antiplatelet agent, heparin, anticoagulant, oral corticosteroid, anxiolytic, hypnotic, antidepressant, antipsychotic).



**Table S11. Association between statin exposure and in-hospital deaths in COVID-19-related hospitalized individuals (N=9,396)**

|                                      | Death*<br>N = 1529 | Unadjusted model† |         | Fully adjusted model‡ |         | IPTW further adjusted model§ |         |
|--------------------------------------|--------------------|-------------------|---------|-----------------------|---------|------------------------------|---------|
|                                      |                    | HR [95% CI]¶      | P-value | HR [95% CI]¶          | P-value | HR [95% CI]¶                 | P-value |
| <b>Statin exposure</b>               |                    |                   |         |                       |         |                              |         |
| No exposure                          | 839 (16.70)        | 1                 | .       | 1                     | .       | 1                            | .       |
| Statin exposure                      | 690 (15.78)        | 0.94 [0.85-1.04]  | 0.2597  | 0.84 [0.76-0.93]      | 0.0012  | 0.87 [0.79-0.96]             | 0.0083  |
| <b>Type of statin</b>                |                    |                   |         |                       |         |                              |         |
| No exposure                          | 839 (16.70)        | 1                 | .       | 1                     | .       | 1                            | .       |
| Atorvastatin                         | 309 (15.90)        | 0.95 [0.83-1.08]  | 0.4297  | 0.85 [0.74-0.97]      | 0.0141  | 0.85 [0.74-0.97]             | 0.0191  |
| Fluvastatin                          | 21 (22.83)         | 1.44 [0.93-2.22]  | 0.0998  | 1.23 [0.80-1.90]      | 0.3445  | 1.33 [0.86-2.08]             | 0.2017  |
| Pravastatin                          | 113 (15.48)        | 0.93 [0.76-1.13]  | 0.4650  | 0.81 [0.67-0.99]      | 0.0402  | 0.84 [0.68-1.03]             | 0.0868  |
| Rosuvastatin                         | 121 (15.24)        | 0.91 [0.75-1.10]  | 0.3185  | 0.83 [0.68-1.00]      | 0.0515  | 0.88 [0.73-1.07]             | 0.1981  |
| Simvastatin                          | 126 (15.52)        | 0.93 [0.77-1.12]  | 0.4214  | 0.83 [0.69-1.00]      | 0.0553  | 0.89 [0.73-1.07]             | 0.2098  |
| <b>Statin intensity</b>              |                    |                   |         |                       |         |                              |         |
| No exposure                          | 839 (16.70)        | 1                 | .       | 1                     | .       | 1                            | .       |
| Low                                  | 133 (17.10)        | 1.03 [0.86-1.24]  | 0.7353  | 0.91 [0.76-1.10]      | 0.3452  | 0.96 [0.80-1.16]             | 0.6716  |
| Moderate                             | 494 (15.29)        | 0.91 [0.82-1.02]  | 0.1034  | 0.82 [0.73-0.92]      | 0.0007  | 0.85 [0.76-0.95]             | 0.0050  |
| High                                 | 63 (17.36)         | 1.04 [0.81-1.34]  | 0.7635  | 0.87 [0.67-1.13]      | 0.3038  | 0.85 [0.64-1.14]             | 0.2830  |
| <b>Statin intensity and its type</b> |                    |                   |         |                       |         |                              |         |
| No exposure                          | 839 (16.70)        | 1                 | .       | 1                     | .       | 1                            | .       |
| Fluvastatin 20/40                    | 13 (22.41)         | 1.42 [0.82-2.45]  | 0.2102  | 1.27 [0.73-2.19]      | 0.3974  | 1.44 [0.84-2.45]             | 0.1813  |
| Pravastatin 10/20                    | 87 (16.20)         | 0.97 [0.78-1.21]  | 0.8087  | 0.86 [0.68-1.07]      | 0.1674  | 0.88 [0.70-1.10]             | 0.2616  |
| Simvastatin 10                       | 33 (18.03)         | 1.09 [0.77-1.54]  | 0.6311  | 0.99 [0.70-1.40]      | 0.9481  | 1.06 [0.75-1.51]             | 0.7270  |
| Atorvastatin 10/20                   | 255 (15.57)        | 0.93 [0.81-1.07]  | 0.2969  | 0.84 [0.73-0.97]      | 0.0151  | 0.85 [0.74-0.98]             | 0.0286  |
| Fluvastatin 80                       | 8 (23.53)          | 1.47 [0.73-2.95]  | 0.2775  | 1.18 [0.59-2.38]      | 0.6418  | 1.15 [0.53-2.53]             | 0.7223  |
| Pravastatin 40                       | 26 (13.47)         | 0.81 [0.55-1.19]  | 0.2842  | 0.70 [0.47-1.03]      | 0.0699  | 0.72 [0.47-1.09]             | 0.1162  |
| Rosuvastatin 5/10                    | 112 (15.20)        | 0.91 [0.74-1.10]  | 0.3240  | 0.83 [0.68-1.01]      | 0.0626  | 0.88 [0.72-1.07]             | 0.2051  |
| Simvastatin 20/40                    | 93 (14.79)         | 0.88 [0.71-1.09]  | 0.2396  | 0.79 [0.63-0.98]      | 0.0293  | 0.84 [0.67-1.04]             | 0.1054  |
| Atorvastatin 40/80                   | 54 (17.65)         | 1.06 [0.81-1.40]  | 0.6765  | 0.89 [0.67-1.17]      | 0.3935  | 0.84 [0.62-1.16]             | 0.2907  |
| Rosuvastatin 20                      | 9 (15.79)          | 0.93 [0.48-1.80]  | 0.8366  | 0.80 [0.41-1.55]      | 0.5091  | 0.91 [0.46-1.78]             | 0.7755  |

HR for hazard ratio; 95% CI for 95% confidence interval; IPTW for inverse probability of treatment weighting.

<sup>\*</sup>There is a lower number of 119 individuals (44 in statin group and 75 in unexposed group) compared with the total number of deaths reported in Table 3 (n=1648). These individuals were not included in the present table as they died of COVID-19 but were hospitalized for other reasons than COVID-19.

<sup>†</sup>Cox proportional hazards model.

<sup>‡</sup>Cox proportional hazards model adjusted for the following covariates: social deprivation index, smoking-, alcohol-, and obesity-related conditions, liver failure, and concomitant medications (non-steroidal anti-inflammatory, low-dose aspirin, antiplatelet agent, heparin, anticoagulant, oral corticosteroid, anxiolytic, hypnotic, antidepressant, antipsychotic), and influenza vaccination.

<sup>§</sup>Cox proportional hazards model with IPTW and further adjustment with the same variables as those in the full adjusted model.

<sup>||</sup>The strength of the association between statins and in-hospital death for COVID-19 was less strong than that of Table 3. This may be due to the difference in the used designs: conventional Cox proportional hazards model in this table vs conditional Cox proportional hazards model on Table 3. The latter model could not be used here as the number of paired statin users and their matched controls was small (n=17) in this sub-sample of hospitalized individuals for COVID-19.

**Table S12. Impact of history of influenza vaccination on the association between statin exposure and severe COVID-19 outcomes**

a. Description of influenza vaccination according to statin exposure

|                                                   | No exposure<br>(n = 2,058,249) | Statin exposure<br>(n = 2,058,249) | Standardized<br>difference |
|---------------------------------------------------|--------------------------------|------------------------------------|----------------------------|
| Influenza vaccination since<br>November 15, 2017* |                                |                                    |                            |
| No                                                | 1,235,041 (60.0)               | 1,058,253 (51.4)                   | 0.17357                    |
| Yes                                               | 823,208 (40.0)                 | 999,996 (48.6)                     |                            |

\*Variable defined from ATC codes J07BB (at least one dispensing since November 15, 2017).

b. Association between statin exposure and hospitalization for COVID-19 in a fully adjusted conditional Cox proportional hazards model with further adjustment for history of influenza vaccination

|                    | Hospitalization<br>N = 9396 | Unadjusted model* |         | Fully adjusted model† |         | IPTW further adjusted model‡ |         |
|--------------------|-----------------------------|-------------------|---------|-----------------------|---------|------------------------------|---------|
|                    |                             | HR [95% CI]       | P-value | HR [95% CI]           | P-value | HR [95% CI]                  | P-value |
| Statin exposure No | 5,024 (0.24)                | 1                 | .       | 1                     | .       | 1                            | .       |
| Yes                | 4,372 (0.21)                | 0.87 [0.83-0.90]  | <.0001  | 0.84 [0.80-0.87]      | <.0001  | 0.83 [0.79-0.87]             | <.0001  |

HR for hazard ratio; 95% CI for 95% confidence interval; IPTW for inverse probability of treatment weighting.

\*Conditional Cox proportional hazards model.

†Conditional Cox proportional hazards model adjusted for the following covariates: social deprivation index, smoking-, alcohol-, and obesity-related conditions, liver failure, and concomitant medications (non-steroidal anti-inflammatory, low-dose aspirin, antiplatelet agent, heparin, anticoagulant, oral corticosteroid, anxiolytic, hypnotic, antidepressant, antipsychotic), and influenza vaccination.

‡Conditional Cox proportional hazards model with IPTW and further adjustment with the same variables as those in the full adjusted model.

c. Association between statin exposure and in-hospital death for COVID-19 in a fully adjusted conditional Cox proportional hazards model with further adjustment for history of influenza vaccination

|                    | Death<br>N= 1648 | Unadjusted model* |         | Fully adjusted model† |         | IPTW further adjusted model‡ |         |
|--------------------|------------------|-------------------|---------|-----------------------|---------|------------------------------|---------|
|                    |                  | HR [95% CI]       | P-value | HR [95% CI]           | P-value | HR [95% CI]                  | P-value |
| Statin exposure No | 914 (0.044)      | 1                 | .       | 1                     | .       | 1                            | .       |
| Yes                | 734 (0.036)      | 0.80 [0.73-0.88]  | <.0001  | 0.77 [0.69-0.86]      | <.0001  | 0.76 [0.68-0.85]             | <.0001  |

HR for hazard ratio; 95% CI for 95% confidence interval; IPTW for inverse probability of treatment weighting.

\*Conditional Cox proportional hazards model.

†Conditional Cox proportional hazards model adjusted for the following covariates: social deprivation index, smoking-, alcohol-, and obesity-related conditions, liver failure, and concomitant medications (non-steroidal anti-inflammatory, low-dose aspirin, antiplatelet agent, heparin, anticoagulant, oral corticosteroid, anxiolytic, hypnotic, antidepressant, antipsychotic), and influenza vaccination.

‡Conditional Cox proportional hazards model with IPTW and further adjustment with the same variables as those in the full adjusted model.

**Figure S1. Standardized differences before and after inverse probability of treatment weighting (IPTW)**

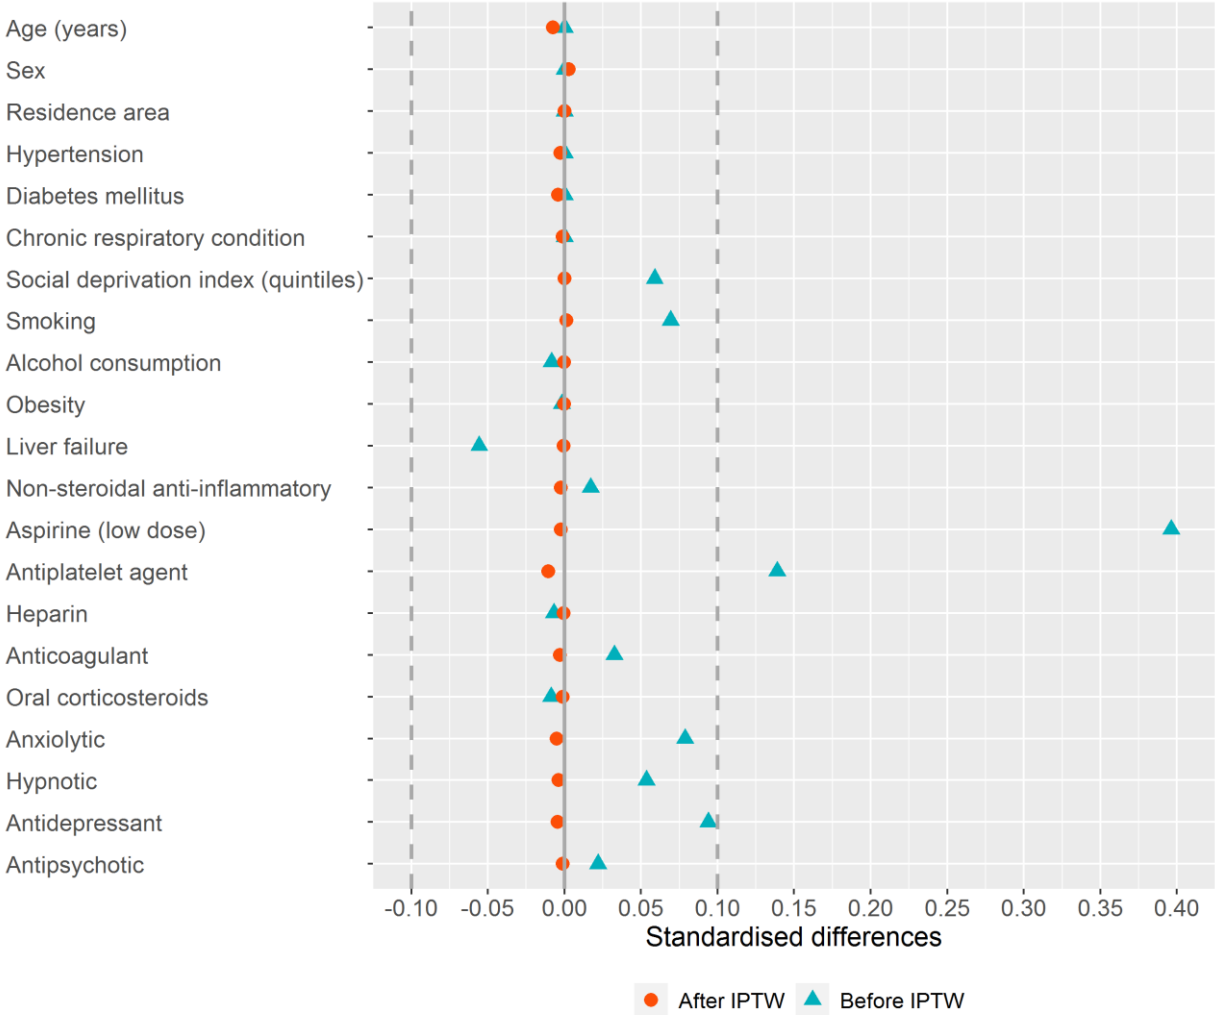

**Figure S2. Association between statin exposure and in-hospital deaths from COVID-19: results from literature review**

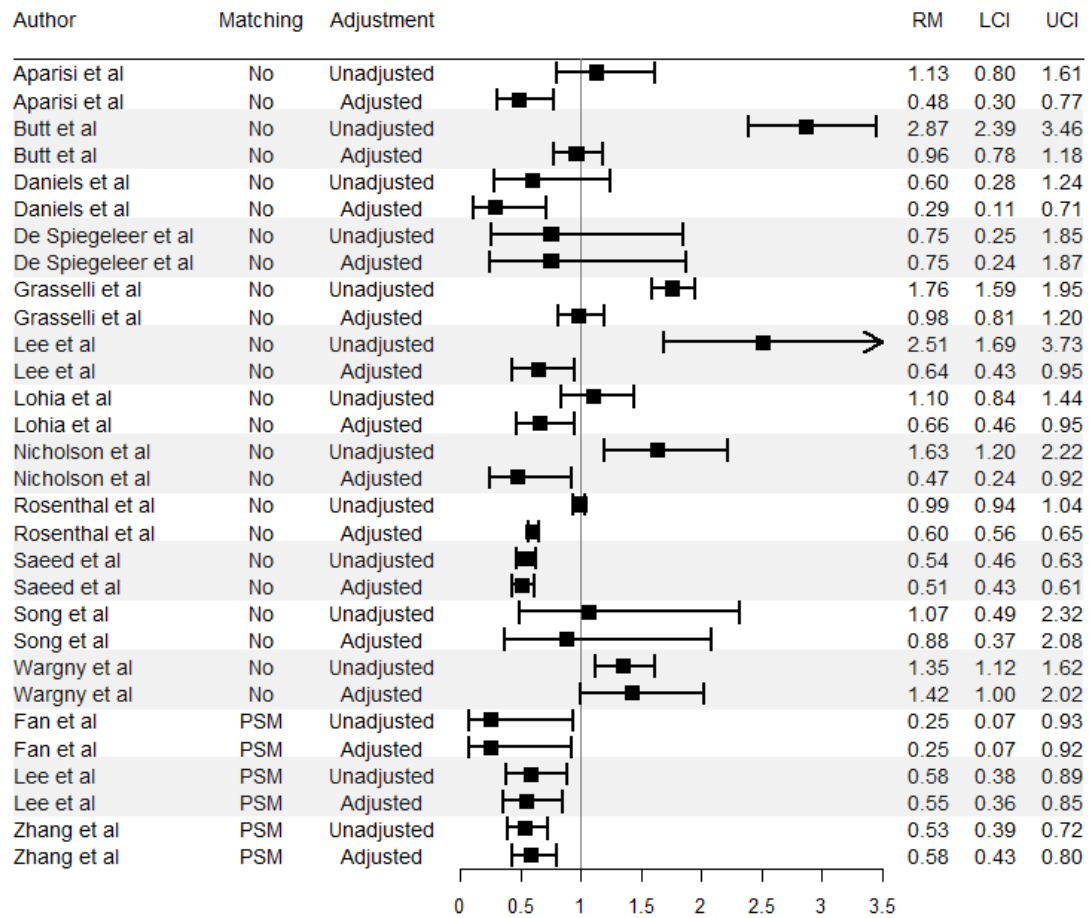

RM for ratio measures referring to effect measures such as odds ratio and hazard ratio; LCI for 95% lower limit of the confidence interval; UCI for 95% upper limit of the confidence interval; PSM for propensity score matching.
